# Supplementary material for: Degradation of tetracycline hydrochloride by near-infrared light-responsive 0D/3D GdF 3 :Yb 3+ ,Er 3+ /MgIn 2 S 4 upconversion photocatalysts
Source: Royal Society of Chemistry journal article supplement (doi:10.1039/d4nj05465b), 2025-01-01
Supplement: d4nj05465b1.pdf [file d4nj05465b1.pdf]

## Supporting Information

### **Degradation of tetracycline hydrochloride by near-infrared light-responsive 0D/3D GdF<sub>3</sub>: Yb<sup>3+</sup>, Er<sup>3+</sup>/MgIn<sub>2</sub>S<sub>4</sub> upconversion photocatalysts**

Juanqin Xue, Zhaoyuan Cao, Guangdong Wu, Haodi Song, and Qiang Bi\*

School of Chemistry and Chemical Engineering, Xi'an University of Architecture and Technology,

Xi'an, 710055, China

\* Corresponding author. *E-mail Addresses*: biq@xauat.edu.cn (Qiang Bi).

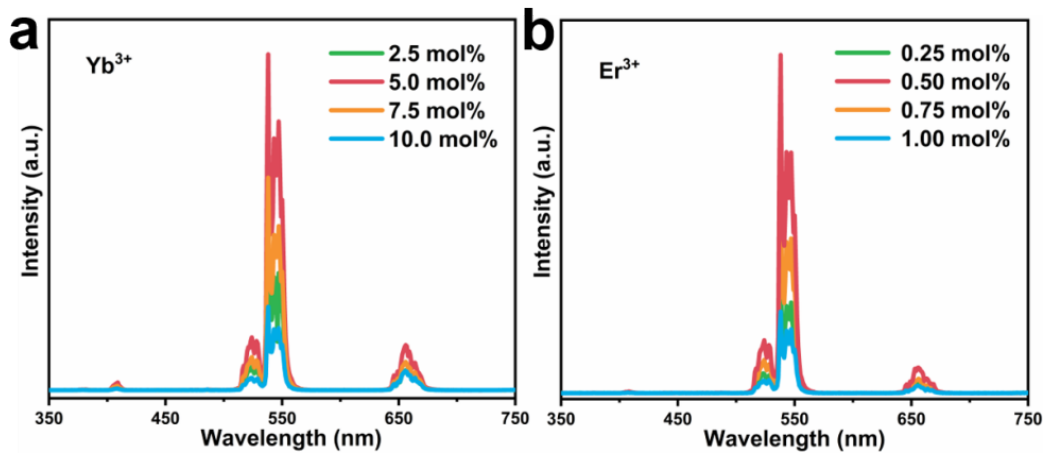

**Fig. S1.** Upconversion emission spectra of GFYE with different  $\text{Yb}^{3+}$  contents(a) and  $\text{Er}^{3+}$  contents(b).

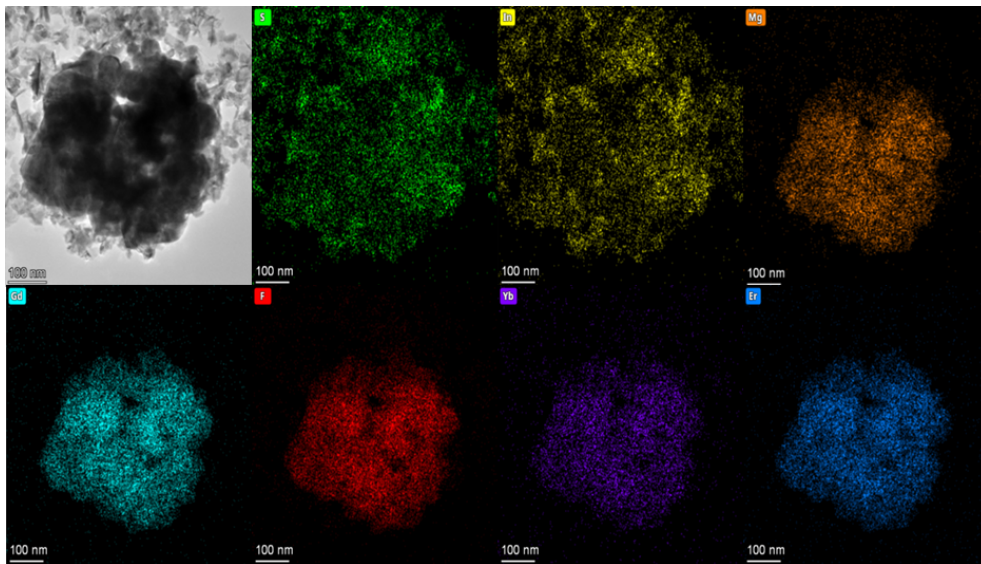

**Fig. S2.** EDS elemental mappings of GFYE(30)/MIS

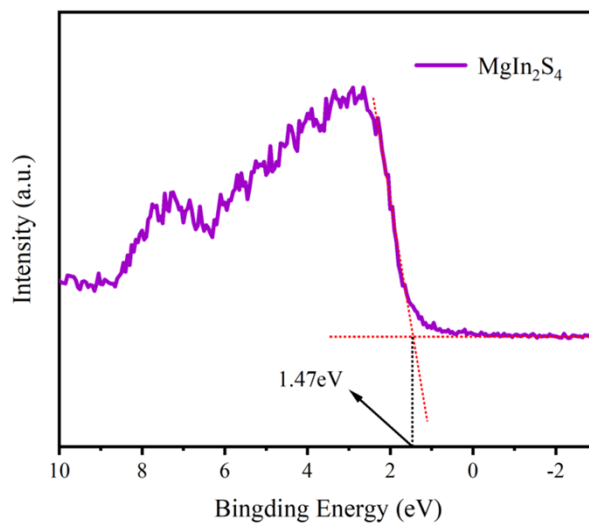

**Fig. S3.** XPS valence band spectrum of  $\text{MgIn}_2\text{S}_4$

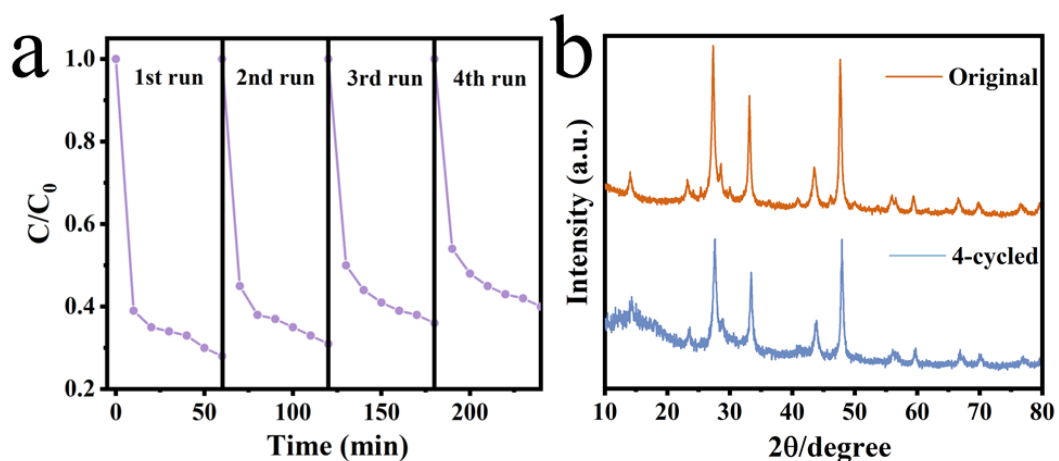

**Fig. S4.** (a) Photocatalytic stability test of GFYE(30)/MIS under  $\lambda \geq 400$  nm light. (b) XRD patterns of GFYE(30)/MIS before and after photocatalytic reaction

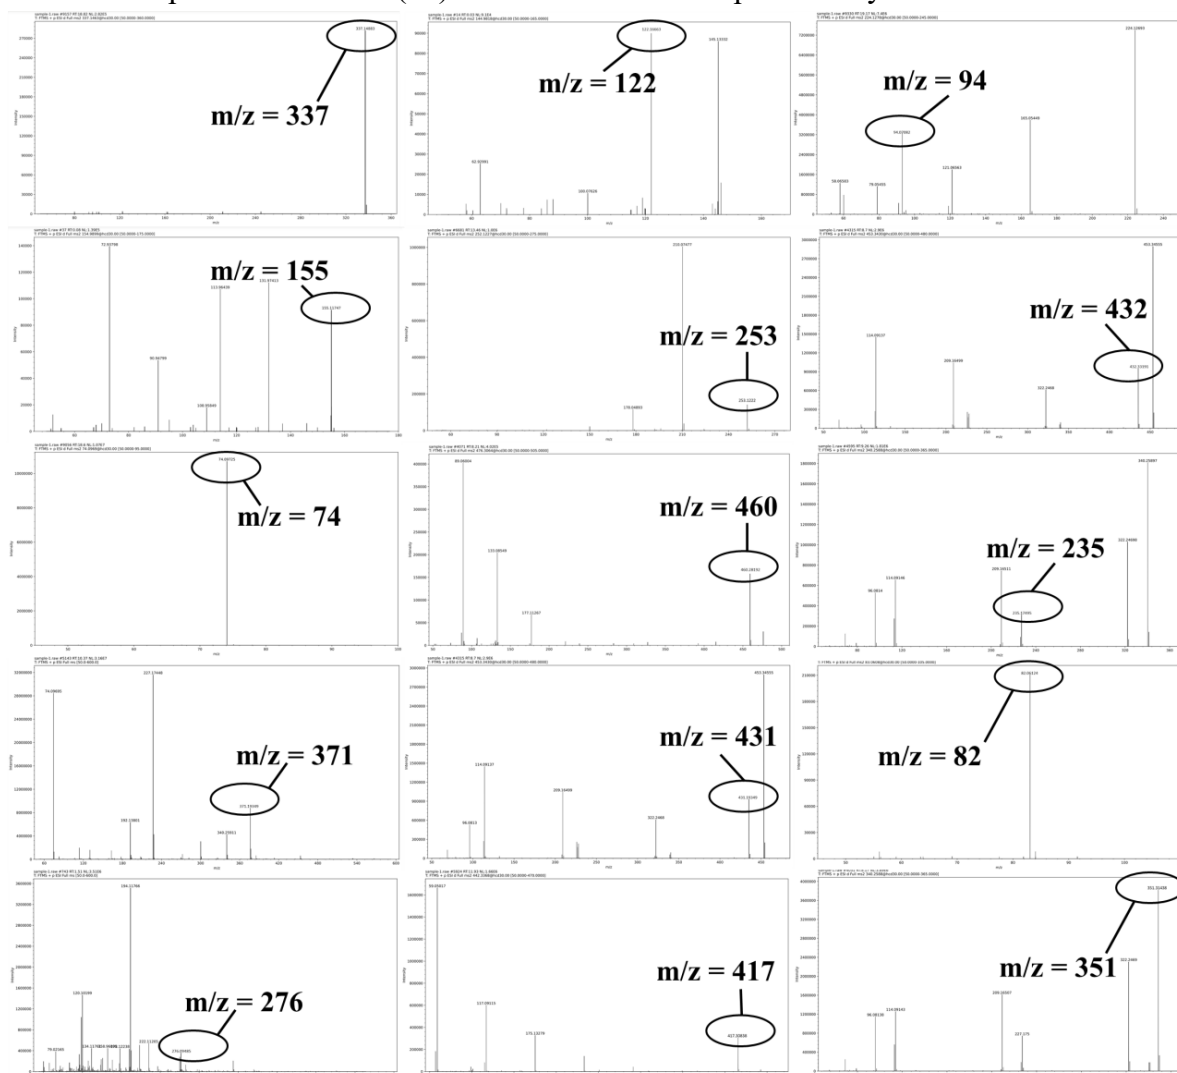

**Fig. S5.** LC-MS spectra of the degraded products of TCH

**Table S1.** Different samples' surface area and pore volume

| Catalysts                                                                              | S (m <sup>2</sup> /g) | Pore volume (cm <sup>3</sup> /g) |
|----------------------------------------------------------------------------------------|-----------------------|----------------------------------|
| GdF <sub>3</sub> :Yb <sup>3+</sup> ,Er <sup>3+</sup> /MgIn <sub>2</sub> S <sub>4</sub> | 68.3341               | 0.241951                         |
| MgIn <sub>2</sub> S <sub>4</sub>                                                       | 58.5251               | 0.226379                         |

**Table S2.** Fitting results of fluorescence decay curve in 524nm

| Model                     | ExpDec2                                        | ExpDec2                                        |
|---------------------------|------------------------------------------------|------------------------------------------------|
| <b>Equation</b>           | $I(t)=A_1\exp(-t/\tau_1) + A_2\exp(-t/\tau_2)$ | $I(t)=A_1\exp(-t/\tau_1) + A_2\exp(-t/\tau_2)$ |
| <b>Drawing</b>            | GFYE                                           | GFYE (30)/MIS                                  |
| <b>A<sub>1</sub></b>      | 0.52067 ± 0.12637                              | 0.34686 ± 0.0689                               |
| <b>τ<sub>1</sub></b>      | 325967.79486 ± 27997.10125                     | 90875.97167 ± 9737.49826                       |
| <b>A<sub>2</sub></b>      | 0.49309 ± 0.12758                              | 0.33538 ± 0.43741                              |
| <b>τ<sub>2</sub></b>      | 588019.77981 ± 42148.14129                     | 277444.65676 ± 148456.75144                    |
| <b>Reduced Chi-Sqr</b>    | 1.18444E-4                                     | 6.51264E-5                                     |
| <b>R-squared (COD)</b>    | 0.99594                                        | 0.99082                                        |
| <b>Adjusted R-squared</b> | 0.99593                                        | 0.9908                                         |

**Table S3.** Fitting results of fluorescence decay curve in 538nm

| Model                     | ExpDec2                                        | ExpDec2                                        |
|---------------------------|------------------------------------------------|------------------------------------------------|
| <b>Equation</b>           | $I(t)=A_1\exp(-t/\tau_1) + A_2\exp(-t/\tau_2)$ | $I(t)=A_1\exp(-t/\tau_1) + A_2\exp(-t/\tau_2)$ |
| <b>Drawing</b>            | GFYE                                           | GFYE (30)/MIS                                  |
| <b>A<sub>1</sub></b>      | 1.00948 ± 0.01274                              | 0.36553                                        |
| <b>τ<sub>1</sub></b>      | 403027.17353 ± 3476.43139                      | 293968.36147                                   |
| <b>A<sub>2</sub></b>      | 0.04315 ± 0.01309                              | 0.3495                                         |
| <b>τ<sub>2</sub></b>      | 1084814.75255 ± 165689.93331                   | 381908.04343                                   |
| <b>Reduced Chi-Sqr</b>    | 3.00794E-5                                     | 3.94247E-5                                     |
| <b>R-squared (COD)</b>    | 0.99893                                        | 0.99831                                        |
| <b>Adjusted R-squared</b> | 0.99893                                        | 0.9983                                         |

**Table S4.** Antibiotic degradation comparison table of upconversion photocatalytic materials

| Photocatalyst                    | Initial concentration | Light                          | Time (min) | Removal efficiency | Reference                                     |
|----------------------------------|-----------------------|--------------------------------|------------|--------------------|-----------------------------------------------|
| MgIn <sub>2</sub> S <sub>4</sub> | 10 mg/L 50 ml TCH     | 300 W xenon lamp<br>λ > 400 nm | 60         | 58 %               | This work (MgIn <sub>2</sub> S <sub>4</sub> ) |
| MgIn <sub>2</sub> S <sub>4</sub> | 20 mg/L 150 ml TC     | 300 W xenon lamp<br>λ > 420 nm | 100        | 17 %               | Chemosphere (2022)                            |

|                                                                                           |                       |                                                  |     |      |                                                                                                           |
|-------------------------------------------------------------------------------------------|-----------------------|--------------------------------------------------|-----|------|-----------------------------------------------------------------------------------------------------------|
| <b>MgIn<sub>2</sub>S<sub>4</sub></b>                                                      | 20 mg/L<br>100 ml TCH | 300 W metal<br>halide lamp $\lambda$<br>> 420 nm | 20  | 15 % | Applied Surface<br>Science(2022)                                                                          |
| <b>MgIn<sub>2</sub>S<sub>4</sub></b>                                                      | 20 mg/L<br>50 mL OTC  | 300 W xenon<br>lamp<br>$\lambda$ > 420 nm        | 60  | 57 % | Journal of<br>Colloid and<br>Interface<br>Science(2020)                                                   |
| <b>GdF<sub>3</sub>:Yb<sup>3+</sup>,Er<sup>3+</sup><br/>/MgIn<sub>2</sub>S<sub>4</sub></b> | 10 mg/L 50 ml<br>TCH  | 300 W xenon<br>lamp<br>$\lambda$ > 400 nm        | 60  | 72 % | This work<br>(GdF <sub>3</sub> :Yb <sup>3+</sup> ,Er <sup>3+</sup><br>/MgIn <sub>2</sub> S <sub>4</sub> ) |
| <b>FeOOH/MgIn<sub>2</sub>S<sub>4</sub></b>                                                | 20 mg/L<br>150 ml TC  | 300 W xenon<br>lamp<br>$\lambda$ > 420 nm        | 100 | 70 % | Chemosphere<br>(2022)                                                                                     |
| <b>BiOCl/MgIn<sub>2</sub>S<sub>4</sub></b>                                                | 10 mg/L 50 ml<br>CBZ  | 50 W LED<br>lamp                                 | 120 | 65 % | Chemosphere<br>(2021)                                                                                     |

---
